# Supplementary material for: α-Fe2O3 nanoparticles anchored on graphene with 3D quasi-laminated architecture: in situ wet chemistry synthesis and enhanced electrochemical performance for lithium ion batteries
Source: Royal Society of Chemistry journal article supplement (doi:10.1039/c2nj40151g), 2012-01-01
Supplement: c2nj40151g.pdf [file c2nj40151g.pdf]

Electronic Supplementary Information (ESI) for

# **$\alpha$ -Fe<sub>2</sub>O<sub>3</sub> nanoparticles anchored on graphene with 3D quasi-laminated architecture: in situ wet chemistry synthesis and enhanced electrochemical performance for lithium ion batteries**

Dezhi Chen,<sup>a, b</sup> Wei Wei,<sup>a</sup> Ruining Wang,<sup>a</sup> Jingcao Zhu,<sup>a</sup> Lin Guo<sup>a\*</sup>

<sup>a</sup> School of Chemistry and Environment, Beihang University, Beijing, P. R. China, 100191. guolin@buaa.edu.cn; fax: +86-010-82338162; Tel.: +86-010-82338162

<sup>b</sup> School of Environmental and Chemical Engineering, Nanchang Hangkong University, Nanchang, P. R. China, 330063.

## **Supporting information:**

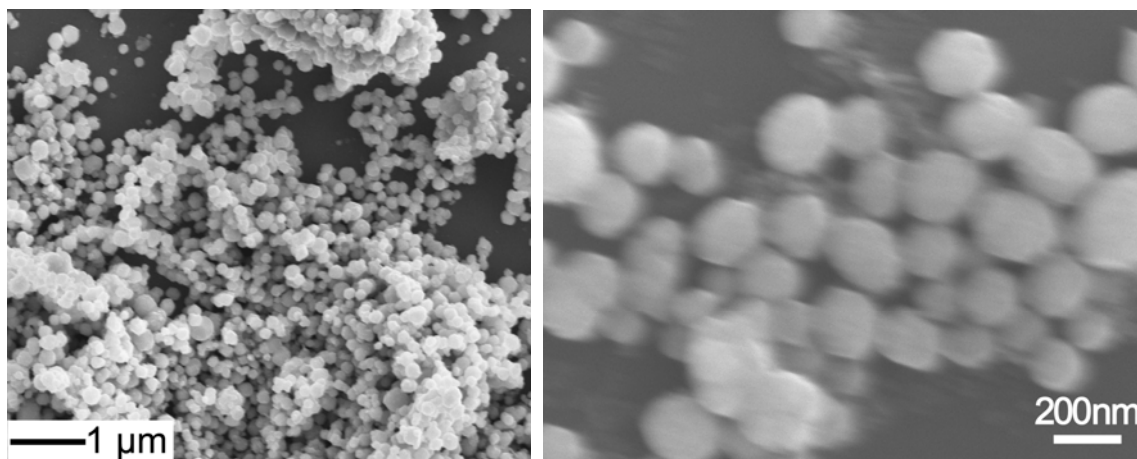

Fig. S1. SEM image of pure  $\alpha$ -Fe<sub>2</sub>O<sub>3</sub> particle with the same procedure in the absence of GO.

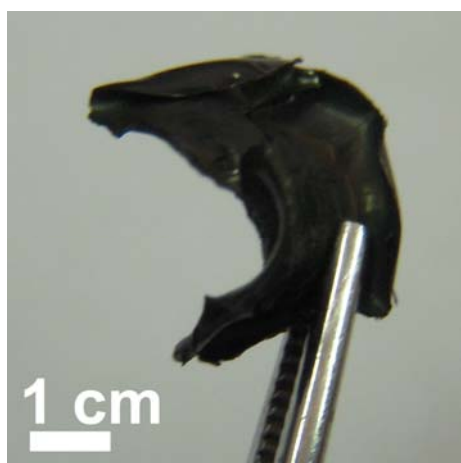

Fig. S2. Digital photo of dried  $\alpha$ -Fe<sub>2</sub>O<sub>3</sub>/graphene composite at 80°C for 24h.

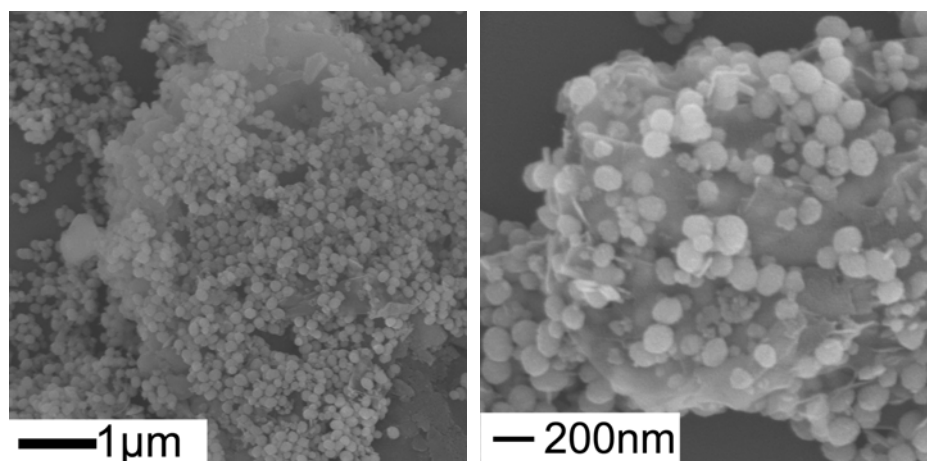

**Fig. S3.** SEM image of  $\alpha$ -Fe<sub>2</sub>O<sub>3</sub>/graphene composite under the same procedure without PVP.
